# Supplementary material for: Validation Study for the Korean Version of Fear of Cancer Recurrence Inventory
Source: PubMed Central journal article supplement — J Korean Med Sci. 2017 Sep 20;32(11):1792–9. doi: 10.3346/jkms.2017.32.11.1792 (PMC5639059; doi:10.3346/jkms.2017.32.11.1792), 2017-09-20
Supplement: jkms-32-1792-s001.pdf [file jkms-32-1792-s001.pdf]

**Supplementary Table 1.** Distribution of participants and non-participants

| Items of participants             | Participants<br>(n = 447) | Non-participants<br>(n = 156) | P value |
|-----------------------------------|---------------------------|-------------------------------|---------|
| Age                               | 56.3 (10.3)               | 58.9 (10.4)                   | 0.007   |
| Time lapse since cancer diagnosis | 5.99 (4.15)               | 5.97 (4.73)                   | 0.953   |
| Sex_female                        | 64.7                      | 64.1                          | 0.902   |
| Cancer site                       |                           |                               | < 0.001 |
| Stomach                           | 39.0                      | 28.8                          |         |
| Breast                            | 25.3                      | 23.7                          |         |
| Lung                              | 9.4                       | 12.2                          |         |
| Thyroid                           | 8.5                       | 7.7                           |         |
| Others                            | 17.8                      | 27.6                          |         |
| Surgery                           | 96.1                      | 92.8                          | 0.102   |
| Chemotherapy                      | 41.5                      | 48.0                          | 0.170   |
| Radiotherapy                      | 37.3                      | 38.7                          | 0.770   |

Data were presented as mean (standard deviation) or percentage.
