# Supplementary material for: Validation Study for the Korean Version of Fear of Cancer Recurrence Inventory
Source: PubMed Central journal article supplement — J Korean Med Sci. 2017 Sep 20;32(11):1792–9. doi: 10.3346/jkms.2017.32.11.1792 (PMC5639059; doi:10.3346/jkms.2017.32.11.1792), 2017-09-20
Supplement: jkms-32-1792-s002.pdf [file jkms-32-1792-s002.pdf]

Supplementary Table 2. K-FCRI

암 진단을 받은 사람들은 대부분 정도의 차이는 있지만 암이 재발 할지도 모른다는 걱정을 합니다. 여기서 암의 재발은 기존 암이 다시 생기거나 진행되는 것을 의미합니다.

이 설문지는 암 경험자의 암 재발에 대한 두려움을 더 잘 이해하기 위해 개발되었습니다.

다음 모든 항목에 대해 지난 한달 동안 귀하가 경험한 것과 가장 잘 일치하는 정도를 골라 해당 칸에 O표 해 주십시오.

| 다음 상황은 암 재발 가능성에 대하여 생각하게 한다.                                       | ① 전혀 그렇지 않다  | ② 드물게 그렇다   | ③ 가끔 그렇다    | ④ 대부분 그렇다   | ⑤ 항상 그렇다    |
|---------------------------------------------------------------------|--------------|-------------|-------------|-------------|-------------|
| 1. 암이나 질병에 대한 텔레비전 프로나 신문기사를 볼 때                                    |              |             |             |             |             |
| 2. 담당 의사나 다른 의사에게 진료받을 때                                            |              |             |             |             |             |
| 3. 병원에서 검사 받을 때 (예: 정기검진, 혈액검사, 방사선검사)                              |              |             |             |             |             |
| 4. 사람들과 암이나 질병에 대해 이야기할 때                                           |              |             |             |             |             |
| 5. 아픈 사람을 보거나 아픈 사람에 대한 얘기를 들을 때                                    |              |             |             |             |             |
| 6. 장례식장에 가거나, 신문에서 부고 기사를 읽을 때                                      |              |             |             |             |             |
| 7. 몸 상태가 안 좋다고 느끼거나 아플 때                                            |              |             |             |             |             |
| 8. 나는 대부분 암 재발 가능성을 생각하게 하는 상황이나 일을 피한다                             |              |             |             |             |             |
|                                                                     | ① 전혀 그렇지 않다  | ② 조금 그렇다    | ③ 다소 그렇다    | ④ 많이 그렇다    | ⑤ 매우 그렇다    |
| 9. 나는 암이 재발할까 봐 걱정되고 불안하다                                           |              |             |             |             |             |
| 10. 나는 암 재발이 두렵다                                                    |              |             |             |             |             |
| 11. 나는 암 재발 가능성을 걱정하고 불안해하는 것이 당연하다고 생각한다                           |              |             |             |             |             |
| 12. 암이 재발할 가능성을 생각할 때 다른 불편한 생각이나 이미지가 떠오른다(죽음, 고통, 내 가족에게 미칠 영향 등) |              |             |             |             |             |
| 13. 나는 완치되었고 암이 다시 생기지 않을 것이라고 믿는다                                  |              |             |             |             |             |
| 14. 스스로 생각하기에, 귀하의 암이 재발할 가능성이 있다고 생각합니까?                           |              |             |             |             |             |
|                                                                     | ① 전혀 생각 안 한다 | ② 한 달에 몇 번  | ③ 일주일에 몇 번  | ④ 하루에 몇 번   | ⑤ 하루에도 여러 번 |
| 15. 암이 재발할 가능성에 대해 얼마나 자주 생각 하십니까?                                  |              |             |             |             |             |
|                                                                     | ① 생각하지 않는다   | ② 몇 초간 생각한다 | ③ 몇 분간 생각한다 | ④ 몇 시간 생각한다 | ⑤ 여러시간 생각한다 |
| 16. 암이 재발할 가능성에 대해 생각한다면 하루 중 얼마 동안 생각하십니까?                         |              |             |             |             |             |
|                                                                     | ① 생각 안 했다    | ② 몇 주간      | ③ 몇 달간      | ④ 몇 년간      | ⑤ 여러 해      |
| 17. 암이 재발할 가능성에 대해 얼마나 오랫동안 생각했습니까?                                 |              |             |             |             |             |
| 암이 재발할 가능성에 대해 생각할 때 다음과 같은 감정을 느끼니까?                               | ① 전혀 그렇지 않다  | ② 조금 그렇다    | ③ 다소 그렇다    | ④ 많이 그렇다    | ⑤ 매우 그렇다    |
| 18. 걱정, 두려움, 불안                                                     |              |             |             |             |             |
| 19. 슬픔, 의기소침, 실망                                                    |              |             |             |             |             |
| 20. 좌절, 화, 분노                                                       |              |             |             |             |             |
| 21. 무력함, 체념                                                         |              |             |             |             |             |

| 암이 재발할 가능성에 대한 걱정과 두려움 때문에 다음 일들에 지장이 있습니까?          | ①<br>전혀 그렇지 않다 | ②<br>조금 그렇다  | ③<br>다소 그렇다 | ④<br>많이 그렇다  | ⑤<br>매우 그렇다 |
|------------------------------------------------------|----------------|--------------|-------------|--------------|-------------|
| 22. 사회활동이나 여가활동 (예: 야유회, 스포츠활동, 여행)                  |                |              |             |              |             |
| 23. 직업 활동이나 일상 생활                                    |                |              |             |              |             |
| 24. 배우자(이성친구), 가족, 친한 사람과의 관계                        |                |              |             |              |             |
| 25. 장래 계획을 세우거나 인생 목표를 정하는 것                         |                |              |             |              |             |
| 26. 마음이나 감정 상태                                       |                |              |             |              |             |
| 27. 전반적인 삶의 질                                        |                |              |             |              |             |
| 28. 내가 암 재발 가능성에 대해 지나치게 걱정하고 있다고 느낀다                |                |              |             |              |             |
| 29. 다른 사람들은 내가 암 재발에 대해 지나치게 걱정하고 있다고 생각한다           |                |              |             |              |             |
| 30. 다른 암환자에 비해 내가 암 재발 가능성에 대해 더 많이 걱정하고 있다고 생각한다    |                |              |             |              |             |
| 암이 재발할 가능성에 대해 생각할 때는 스스로를 안심시키기 위해 다음과 같은 방법을 사용한다. | ①<br>전혀 그렇지 않다 | ②<br>드물게 그렇다 | ③<br>가끔 그렇다 | ④<br>대부분 그렇다 | ⑤<br>항상 그렇다 |
| 31. 담당 의사나 다른 의료인과 상담한다                              |                |              |             |              |             |
| 32. 병원에 가서 검사를 받아본다                                  |                |              |             |              |             |
| 33. 암 관련 신체 증상이 있는지 스스로 살펴본다                         |                |              |             |              |             |
| 34. 관심을 다른 데로 분산시키려 노력한다 (예: 텔레비전 시청, 독서, 일하기)       |                |              |             |              |             |
| 35. 암 재발에 대해 생각하지 않고 내 마음에서 멀리하려고 노력한다               |                |              |             |              |             |
| 36. 기도나 명상, 이완요법을 한다.                                |                |              |             |              |             |
| 37. 다 잘 될 것이라고 스스로 위안하거나 긍정적으로 생각한다                  |                |              |             |              |             |
| 38. 다른 사람과 암 재발에 대해 이야기한다                            |                |              |             |              |             |
| 39. 이성적으로 상황을 이해하고 대처하려고 노력한다                        |                |              |             |              |             |
| 40. 해결책을 찾으려고 한다                                     |                |              |             |              |             |
| 41. 즐거운 생각으로 대체하려고 노력한다                              |                |              |             |              |             |
| 42. 나 스스로에게 "그런 생각을 멈추자"라고 말한다                       |                |              |             |              |             |
| 위와 같은 방법들을 사용하면 안심하게 됩니까?                            |                |              |             |              |             |
